# Supplementary material for: Maternal Risk Factors Associated with Negative COVID-19 Outcomes and Their Relation to Socioeconomic Indicators in Brazil
Source: MDPI journal article supplement (doi:10.3390/healthcare11142072), 2023-07-20
Supplement: s1 [file s1]

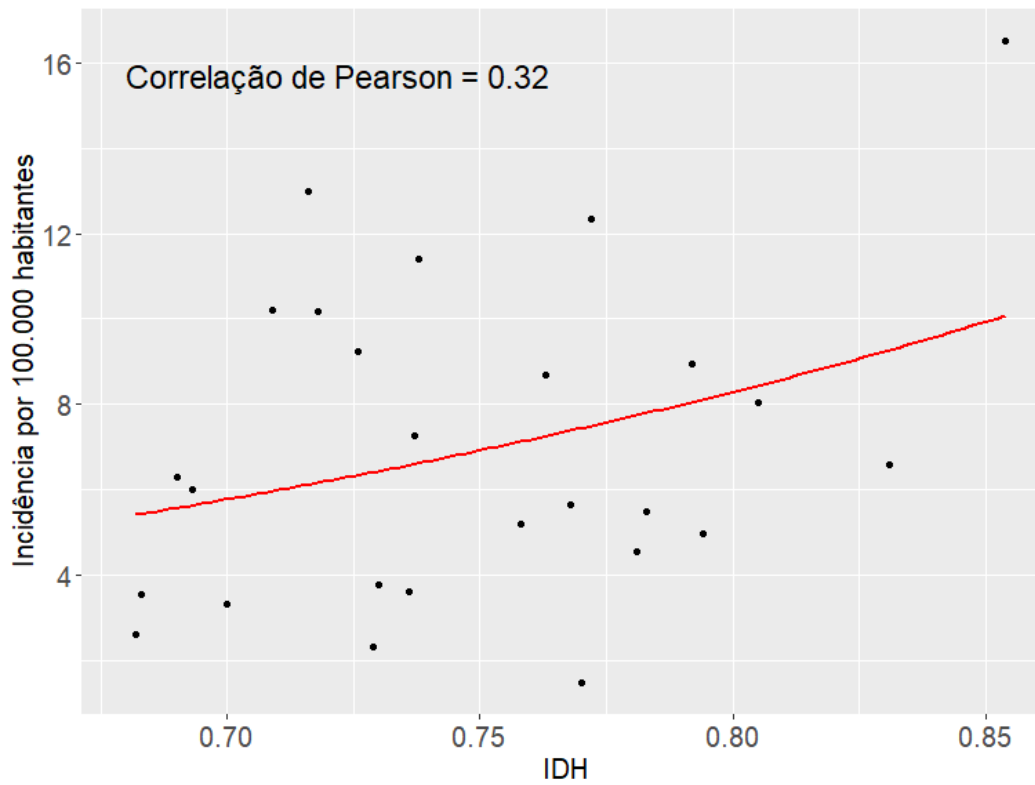

Figure S1: Poisson model adjusted to the points of incidence of Covid-19 cases in pregnant women by the HDI of the state

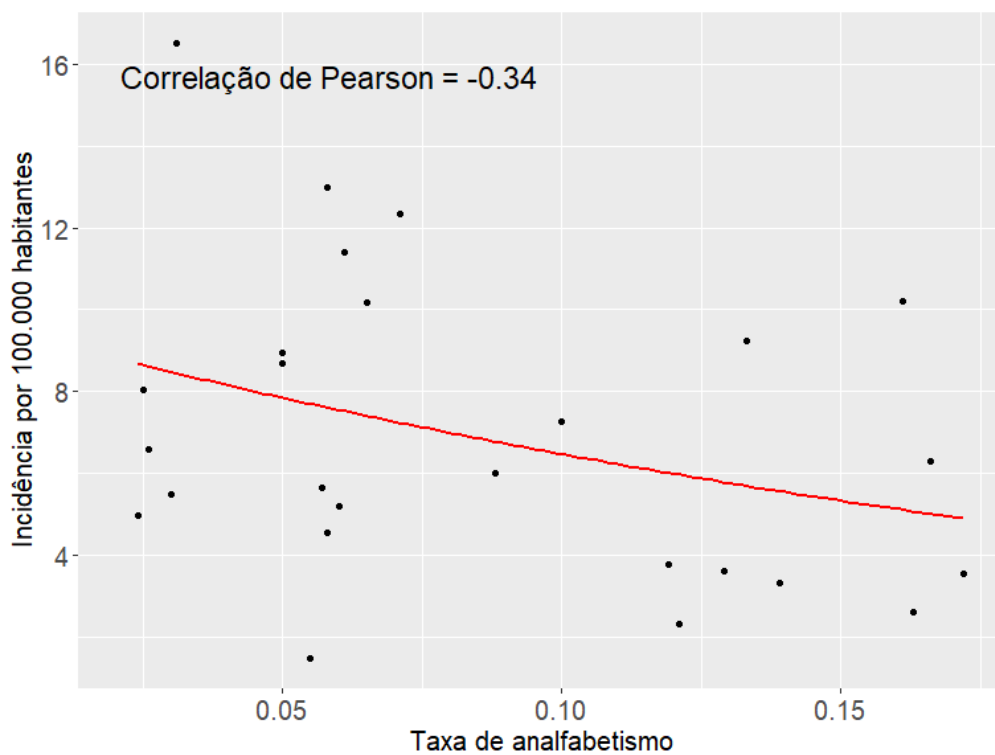

Figure S2: Poisson model adjusted to points of incidence of Covid-19 cases in pregnant women by state illiteracy rate.

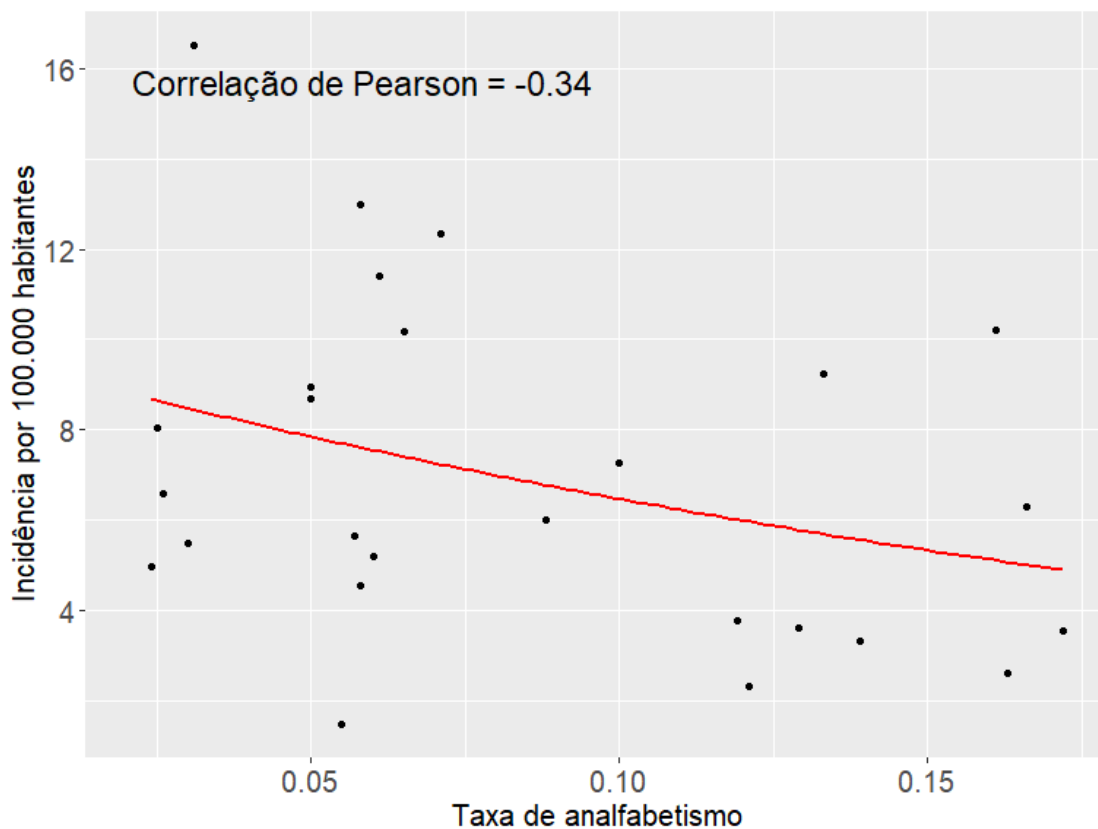

Figure S3: Poisson model adjusted to points of incidence of Covid-19 cases in pregnant women by per capita income in the state.

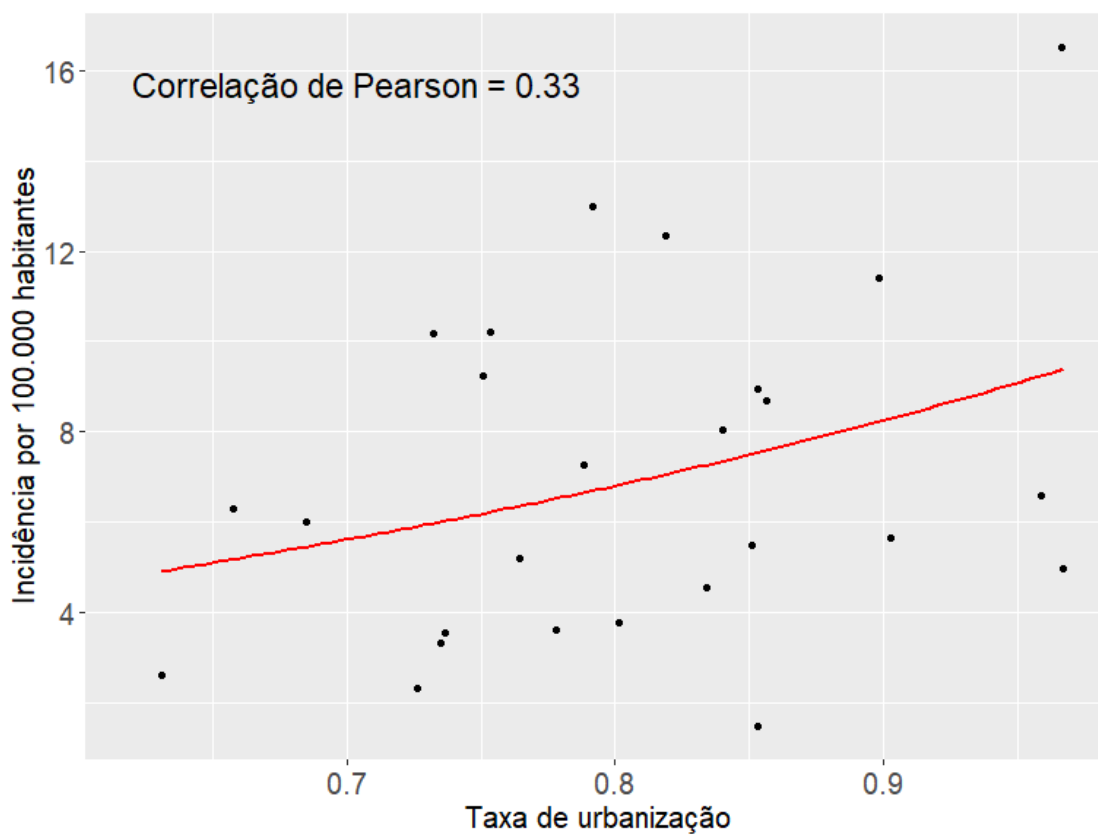

Figure S4: Poisson model adjusted to points of incidence of Covid-19 cases in pregnant women by state urbanization rate.
